# Supplementary material
Source: Springer Nature journal article supplement (https://www.springermedizin.de/resource/supplementary/13231_2009_10_MOESM3_ESM.pdf/9676362)

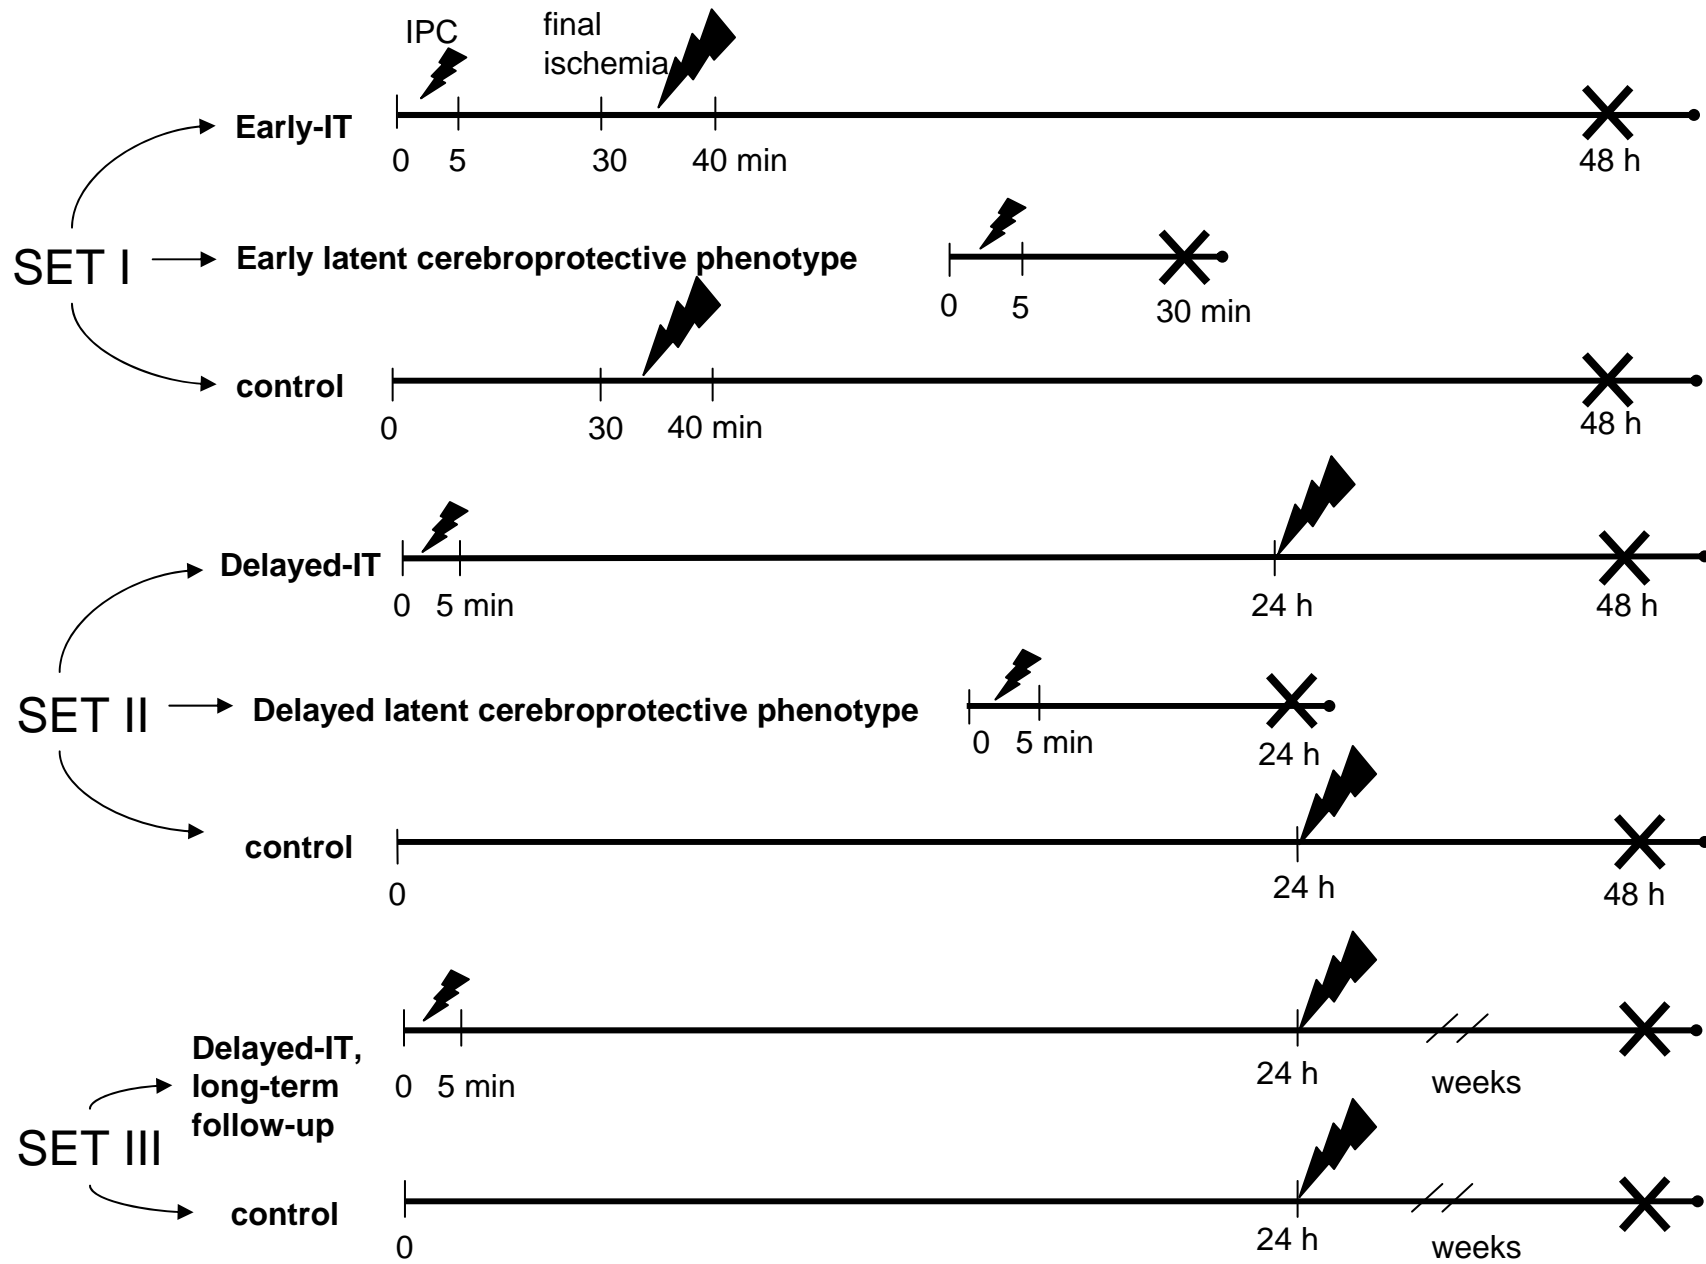

Supplement: MOESM3 [file 9676362]
